# Supplementary material for: A theoretical investigation on the OER and ORR activity of graphene-based TM–N3 and TM–N2X (X = B, C, O, P) single atom catalysts by density functional theory calculations
Source: Royal Society of Chemistry journal article supplement (doi:10.1039/d4cp03779k), 2024-01-01
Supplement: d4cp03779k1.pdf [file d4cp03779k1.pdf]

## Supporting Information

For

### **A theoretical investigation on the OER and ORR activity of graphene-based TM-N<sub>3</sub> and TM-N<sub>2</sub>X (X=B, C, O, P) single atom catalysts by density functional theory calculations**

Jiaxiang Wu<sup>1,2,3</sup>, Erjun Kan<sup>1,2,3</sup>, Cheng Zhan<sup>1,2,3\*</sup>

<sup>1</sup>MIIT Key Laboratory of Semiconductor Microstructure and Quantum Sensing,  
Nanjing University of Science and Technology, Nanjing 210094, China

<sup>2</sup>School of Physics, Nanjing University of Science and Technology, Nanjing 210094,  
China

<sup>3</sup>Engineering Research Center of Semiconductor Device Optoelectronic Hybrid  
Integration in Jiangsu Province, Nanjing 210094

\*Corresponding author: Cheng Zhan

E-mail dress: [czhan@njust.edu.cn](mailto:czhan@njust.edu.cn)

Table S1. The formation energy ( $E_f$ ) of transition metals. The theoretical overpotential ( $\eta$ ), Gibbs free energy change of the oxygenated intermediates ( $\Delta G^*_{\text{OOH}}$ ,  $\Delta G^*_{\text{O}}$ ,  $\Delta G^*_{\text{OH}}$ ).

|                    | $E_b(\text{eV})$ | $\eta_{\text{OER}}(\text{V})$ | $\eta_{\text{ORR}}(\text{V})$ | $G^*_{\text{OH}}(\text{eV})$ | $G^*_{\text{O}}(\text{eV})$ | $G^*_{\text{OOH}}(\text{eV})$ | $^*\text{O}_2(\text{eV})$ |
|--------------------|------------------|-------------------------------|-------------------------------|------------------------------|-----------------------------|-------------------------------|---------------------------|
| TiN <sub>2</sub> B | -2.37            | 2.40                          | 2.01                          | -0.78                        | 0.20                        | 3.63                          | 1.87                      |
| VN <sub>2</sub> B  | -2.56            | 2.48                          | 2.16                          | -0.93                        | 0.48                        | 3.71                          | 1.66                      |
| CrN <sub>2</sub> B | -2.33            | 1.77                          | 1.69                          | -0.46                        | 0.78                        | 3.00                          | 1.60                      |
| MnN <sub>2</sub> B | -0.96            | 2.75                          | 1.19                          | 0.41                         | 0.49                        | 3.98                          | 0.04                      |
| FeN <sub>2</sub> B | -2.36            | 2.18                          | 1.13                          | 0.10                         | 0.30                        | 3.41                          | 1.11                      |
| CoN <sub>2</sub> B | -2.33            | 1.57                          | 1.22                          | 0.01                         | 0.96                        | 2.80                          | 1.15                      |
| NiN <sub>2</sub> B | -1.67            | 0.93                          | 0.69                          | 0.54                         | 1.59                        | 2.16                          | 0.63                      |
| CuN <sub>2</sub> B | -1.36            | 0.50                          | 0.87                          | 0.90                         | 1.93                        | 1.73                          | 0.36                      |
| TiN <sub>2</sub> C | -4.10            | 2.46                          | 2.31                          | -1.08                        | 0.37                        | 3.69                          | 1.94                      |
| VN <sub>2</sub> C  | -4.42            | 2.35                          | 2.21                          | -0.98                        | 0.47                        | 3.58                          | 1.85                      |
| CrN <sub>2</sub> C | -4.00            | 2.16                          | 1.72                          | -0.49                        | 0.21                        | 3.39                          | 1.81                      |
| MnN <sub>2</sub> C | -3.11            | 2.20                          | 1.77                          | -0.54                        | 0.35                        | 3.43                          | 1.68                      |
| FeN <sub>2</sub> C | -3.57            | 2.14                          | 1.42                          | -0.19                        | 0.44                        | 3.37                          | 1.30                      |
| CoN <sub>2</sub> C | -2.41            | 3.19                          | 1.66                          | -0.43                        | 4.42                        | -0.37                         | 1.30                      |
| NiN <sub>2</sub> C | -1.67            | 1.10                          | 0.65                          | 0.59                         | 1.42                        | 2.33                          | 0.58                      |
| CuN <sub>2</sub> C | 0.38             | 2.34                          | 2.59                          | 0.91                         | 1.80                        | 3.57                          | -1.36                     |

|                    |       |      |      |       |       |      |       |
|--------------------|-------|------|------|-------|-------|------|-------|
| TiN <sub>3</sub>   | -3.83 | 4.73 | 2.81 | -1.58 | 0.52  | 0.02 | 5.96  |
| VN <sub>3</sub>    | -6.91 | 3.44 | 2.04 | 1.32  | -0.81 | 4.67 | -0.26 |
| CrN <sub>3</sub>   | -6.17 | 0.26 | 0.67 | 1.49  | 0.56  | 1.48 | 1.39  |
| MnN <sub>3</sub>   | -5.68 | 1.26 | 1.04 | 1.14  | 1.10  | 2.49 | 0.19  |
| FeN <sub>3</sub>   | -4.02 | 1.22 | 2.12 | -0.89 | 1.20  | 2.45 | 2.16  |
| CoN <sub>3</sub>   | -3.67 | 1.12 | 0.77 | 0.46  | 1.20  | 2.35 | 0.91  |
| NiN <sub>3</sub>   | -1.35 | 0.89 | 1.18 | 0.05  | 1.51  | 2.12 | 1.24  |
| CuN <sub>3</sub>   | -0.53 | 0.31 | 0.44 | 0.79  | 1.53  | 1.54 | 1.06  |
| TiN <sub>2</sub> O | 0.54  | 2.78 | 2.60 | -1.37 | 0.36  | 4.01 | 1.92  |
| VN <sub>2</sub> O  | 0.18  | 2.47 | 2.24 | -1.01 | 0.29  | 3.70 | 1.93  |
| CrN <sub>2</sub> O | 0.43  | 1.97 | 1.89 | -0.66 | 0.75  | 3.20 | 1.63  |
| MnN <sub>2</sub> O | 2.37  | 2.11 | 2.19 | -0.96 | 0.62  | 3.34 | 1.92  |
| FeN <sub>2</sub> O | 1.27  | 2.55 | 3.18 | -1.95 | 1.49  | 3.78 | 1.60  |
| CoN <sub>2</sub> O | 1.55  | 0.94 | 1.62 | -0.39 | 1.53  | 2.17 | 1.62  |
| NiN <sub>2</sub> O | 2.97  | 0.81 | 1.11 | 0.12  | 1.28  | 2.04 | 1.48  |
| CuN <sub>2</sub> O | 2.28  | 0.77 | 1.04 | 0.19  | 2.02  | 2.00 | 0.71  |
| TiN <sub>2</sub> P | 2     | 2.12 | 2.30 | -1.07 | 0.53  | 3.35 | 2.11  |
| VN <sub>2</sub> P  | 2.05  | 1.67 | 2.03 | -0.80 | 0.94  | 2.90 | 1.88  |
| CrN <sub>2</sub> P | 2.04  | 1.99 | 0.97 | 0.26  | 0.73  | 3.22 | 0.71  |
| MnN <sub>2</sub> P | 2.64  | 2.30 | 2.70 | -1.47 | 1.46  | 3.53 | 1.40  |
| FeN <sub>2</sub> P | 2.09  | 1.31 | 0.67 | 0.56  | 1.04  | 2.54 | 0.78  |
| CoN <sub>2</sub> P | 0.98  | 1.05 | 0.47 | 1.09  | 0.76  | 2.28 | 0.79  |
| NiN <sub>2</sub> P | 0.29  | 0.66 | 0.63 | 0.60  | 1.78  | 1.89 | 0.65  |
| CuN <sub>2</sub> P | 0.45  | 0.72 | 0.87 | 0.72  | 1.89  | 1.95 | 0.36  |

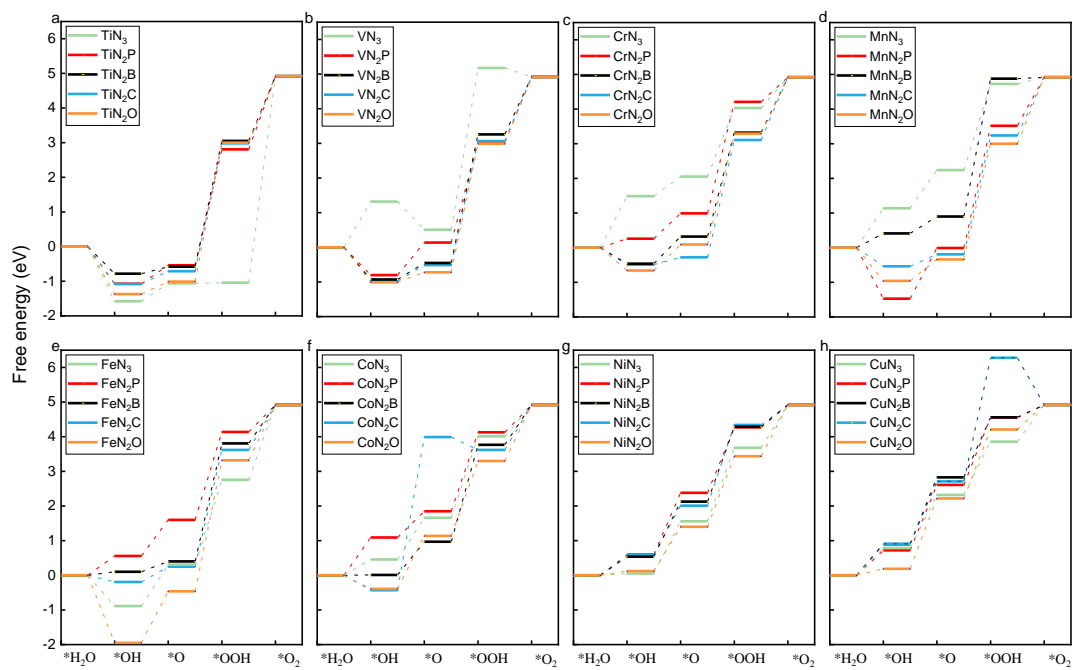

Figure S1. Calculated the free energy profile of  $\text{TMN}_2\text{X}$ .
